# Supplementary material
Source: PubMed Central journal article supplement (PMC4861769)
Supplement: mmc1.pdf [file mmc1.pdf]

# A. Volar epidermis

| Sublist                  | Category      | Term                                                                   | RT | Genes | Count | %   | P-Value | Benjamini |
|--------------------------|---------------|------------------------------------------------------------------------|----|-------|-------|-----|---------|-----------|
| <input type="checkbox"/> | GOTERM_BP_FAT | <a href="#">cell adhesion</a>                                          | RT |       | 9     | 7.3 | 6.9E-2  | 9.1E-1    |
| <input type="checkbox"/> | GOTERM_BP_FAT | <a href="#">biological adhesion</a>                                    | RT |       | 9     | 7.3 | 6.9E-2  | 9.0E-1    |
| <input type="checkbox"/> | GOTERM_BP_FAT | <a href="#">ectoderm development</a>                                   | RT |       | 7     | 5.6 | 1.5E-3  | 6.2E-1    |
| <input type="checkbox"/> | GOTERM_BP_FAT | <a href="#">cytoskeleton organization</a>                              | RT |       | 7     | 5.6 | 5.4E-2  | 9.2E-1    |
| <input type="checkbox"/> | GOTERM_BP_FAT | <a href="#">steroid metabolic process</a>                              | RT |       | 6     | 4.8 | 8.4E-3  | 7.5E-1    |
| <input type="checkbox"/> | GOTERM_BP_FAT | <a href="#">epithelium development</a>                                 | RT |       | 6     | 4.8 | 1.3E-2  | 7.7E-1    |
| <input type="checkbox"/> | GOTERM_BP_FAT | <a href="#">secretion</a>                                              | RT |       | 6     | 4.8 | 3.9E-2  | 9.4E-1    |
| <input type="checkbox"/> | GOTERM_BP_FAT | <a href="#">epithelial cell differentiation</a>                        | RT |       | 5     | 4.0 | 1.0E-2  | 7.4E-1    |
| <input type="checkbox"/> | GOTERM_BP_FAT | <a href="#">epidermis development</a>                                  | RT |       | 5     | 4.0 | 2.8E-2  | 9.3E-1    |
| <input type="checkbox"/> | GOTERM_BP_FAT | <a href="#">response to hypoxia</a>                                    | RT |       | 4     | 3.2 | 5.1E-2  | 9.3E-1    |
| <input type="checkbox"/> | GOTERM_BP_FAT | <a href="#">response to oxygen levels</a>                              | RT |       | 4     | 3.2 | 5.7E-2  | 9.2E-1    |
| <input type="checkbox"/> | GOTERM_BP_FAT | <a href="#">intermediate filament cytoskeleton organization</a>        | RT |       | 3     | 2.4 | 6.7E-3  | 8.9E-1    |
| <input type="checkbox"/> | GOTERM_BP_FAT | <a href="#">intermediate filament-based process</a>                    | RT |       | 3     | 2.4 | 8.1E-3  | 8.3E-1    |
| <input type="checkbox"/> | GOTERM_BP_FAT | <a href="#">keratinization</a>                                         | RT |       | 3     | 2.4 | 2.9E-2  | 9.1E-1    |
| <input type="checkbox"/> | GOTERM_BP_FAT | <a href="#">regulation of proteolysis</a>                              | RT |       | 3     | 2.4 | 4.3E-2  | 9.4E-1    |
| <input type="checkbox"/> | GOTERM_BP_FAT | <a href="#">excretion</a>                                              | RT |       | 3     | 2.4 | 5.0E-2  | 9.4E-1    |
| <input type="checkbox"/> | GOTERM_BP_FAT | <a href="#">keratinocyte differentiation</a>                           | RT |       | 3     | 2.4 | 6.3E-2  | 9.2E-1    |
| <input type="checkbox"/> | GOTERM_BP_FAT | <a href="#">regulation of neurotransmitter levels</a>                  | RT |       | 3     | 2.4 | 6.5E-2  | 9.1E-1    |
| <input type="checkbox"/> | GOTERM_BP_FAT | <a href="#">integrin-mediated signaling pathway</a>                    | RT |       | 3     | 2.4 | 7.0E-2  | 9.0E-1    |
| <input type="checkbox"/> | GOTERM_BP_FAT | <a href="#">epidermal cell differentiation</a>                         | RT |       | 3     | 2.4 | 7.4E-2  | 9.0E-1    |
| <input type="checkbox"/> | GOTERM_BP_FAT | <a href="#">steroid biosynthetic process</a>                           | RT |       | 3     | 2.4 | 9.8E-2  | 9.5E-1    |
| <input type="checkbox"/> | GOTERM_BP_FAT | <a href="#">generation of a signal involved in cell-cell signaling</a> | RT |       | 3     | 2.4 | 9.8E-2  | 9.5E-1    |
| <input type="checkbox"/> | GOTERM_BP_FAT | <a href="#">wound healing, spreading of epidermal cells</a>            | RT |       | 2     | 1.6 | 4.9E-2  | 9.5E-1    |
| <input type="checkbox"/> | GOTERM_BP_FAT | <a href="#">intermediate filament organization</a>                     | RT |       | 2     | 1.6 | 6.0E-2  | 9.2E-1    |

# B. Non-volar epidermis

| Sublist                  | Category      | Term                                                                        | RT | Genes | Count | %    | P-Value | Benjamini |
|--------------------------|---------------|-----------------------------------------------------------------------------|----|-------|-------|------|---------|-----------|
| <input type="checkbox"/> | GOTERM_BP_FAT | <a href="#">cell surface receptor linked signal transduction</a>            | RT |       | 20    | 14.8 | 4.7E-2  | 7.6E-1    |
| <input type="checkbox"/> | GOTERM_BP_FAT | <a href="#">response to organic substance</a>                               | RT |       | 15    | 11.1 | 3.9E-4  | 2.0E-1    |
| <input type="checkbox"/> | GOTERM_BP_FAT | <a href="#">immune response</a>                                             | RT |       | 13    | 9.6  | 2.6E-3  | 4.1E-1    |
| <input type="checkbox"/> | GOTERM_BP_FAT | <a href="#">cell motion</a>                                                 | RT |       | 11    | 8.1  | 1.5E-3  | 3.7E-1    |
| <input type="checkbox"/> | GOTERM_BP_FAT | <a href="#">regulation of cell proliferation</a>                            | RT |       | 11    | 8.1  | 4.3E-2  | 7.8E-1    |
| <input type="checkbox"/> | GOTERM_BP_FAT | <a href="#">regulation of programmed cell death</a>                         | RT |       | 11    | 8.1  | 5.2E-2  | 7.7E-1    |
| <input type="checkbox"/> | GOTERM_BP_FAT | <a href="#">regulation of cell death</a>                                    | RT |       | 11    | 8.1  | 5.3E-2  | 7.6E-1    |
| <input type="checkbox"/> | GOTERM_BP_FAT | <a href="#">positive regulation of macromolecule metabolic process</a>      | RT |       | 11    | 8.1  | 6.9E-2  | 7.7E-1    |
| <input type="checkbox"/> | GOTERM_BP_FAT | <a href="#">behavior</a>                                                    | RT |       | 10    | 7.4  | 4.9E-3  | 4.7E-1    |
| <input type="checkbox"/> | GOTERM_BP_FAT | <a href="#">cell death</a>                                                  | RT |       | 10    | 7.4  | 5.9E-2  | 7.8E-1    |
| <input type="checkbox"/> | GOTERM_BP_FAT | <a href="#">death</a>                                                       | RT |       | 10    | 7.4  | 6.1E-2  | 7.6E-1    |
| <input type="checkbox"/> | GOTERM_BP_FAT | <a href="#">regulation of transcription from RNA polymerase II promoter</a> | RT |       | 10    | 7.4  | 6.2E-2  | 7.6E-1    |
| <input type="checkbox"/> | GOTERM_BP_FAT | <a href="#">lipid biosynthetic process</a>                                  | RT |       | 9     | 6.7  | 1.7E-3  | 3.3E-1    |
| <input type="checkbox"/> | GOTERM_BP_FAT | <a href="#">programmed cell death</a>                                       | RT |       | 9     | 6.7  | 5.9E-2  | 7.8E-1    |
| <input type="checkbox"/> | GOTERM_BP_FAT | <a href="#">defense response</a>                                            | RT |       | 9     | 6.7  | 6.1E-2  | 7.6E-1    |
| <input type="checkbox"/> | GOTERM_BP_FAT | <a href="#">positive regulation of macromolecule biosynthetic process</a>   | RT |       | 9     | 6.7  | 8.0E-2  | 7.8E-1    |
| <input type="checkbox"/> | GOTERM_BP_FAT | <a href="#">positive regulation of cellular biosynthetic process</a>        | RT |       | 9     | 6.7  | 9.9E-2  | 7.9E-1    |
| <input type="checkbox"/> | GOTERM_BP_FAT | <a href="#">epidermis development</a>                                       | RT |       | 8     | 5.9  | 2.7E-4  | 2.7E-1    |
| <input type="checkbox"/> | GOTERM_BP_FAT | <a href="#">ectoderm development</a>                                        | RT |       | 8     | 5.9  | 4.4E-4  | 1.6E-1    |
| <input type="checkbox"/> | GOTERM_BP_FAT | <a href="#">regulation of system process</a>                                | RT |       | 8     | 5.9  | 5.4E-3  | 4.7E-1    |
| <input type="checkbox"/> | GOTERM_BP_FAT | <a href="#">enzyme linked receptor protein signaling pathway</a>            | RT |       | 8     | 5.9  | 9.2E-3  | 5.7E-1    |
| <input type="checkbox"/> | GOTERM_BP_FAT | <a href="#">positive regulation of cell proliferation</a>                   | RT |       | 8     | 5.9  | 2.4E-2  | 6.8E-1    |
| <input type="checkbox"/> | GOTERM_BP_FAT | <a href="#">reproductive process in a multicellular organism</a>            | RT |       | 8     | 5.9  | 5.0E-2  | 7.7E-1    |
| <input type="checkbox"/> | GOTERM_BP_FAT | <a href="#">multicellular organism reproduction</a>                         | RT |       | 8     | 5.9  | 5.0E-2  | 7.7E-1    |
