# Supplementary material
Source: PubMed Central journal article supplement (PMC4861769)

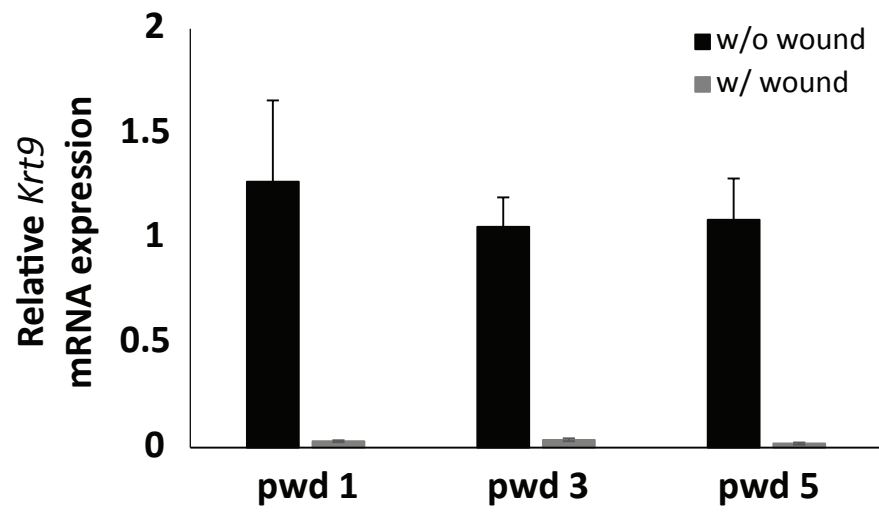

Supplement: mmc11.pdf [file mmc11.pdf]

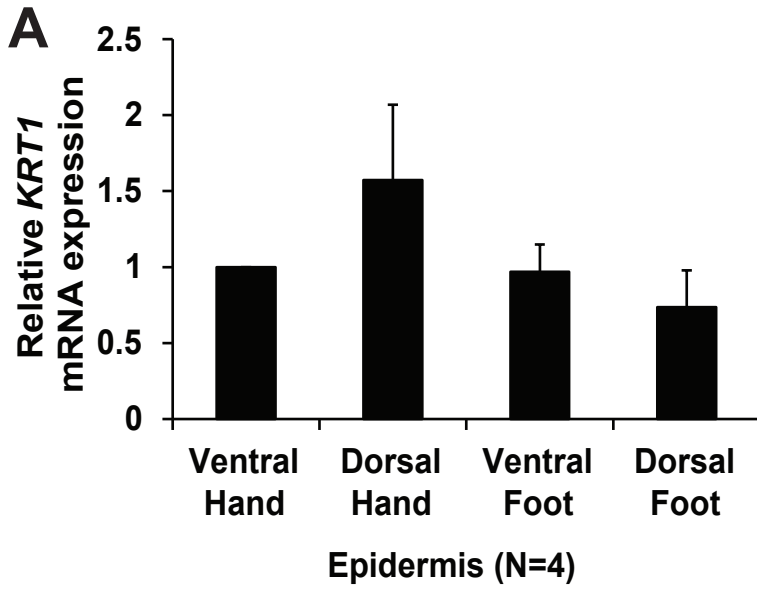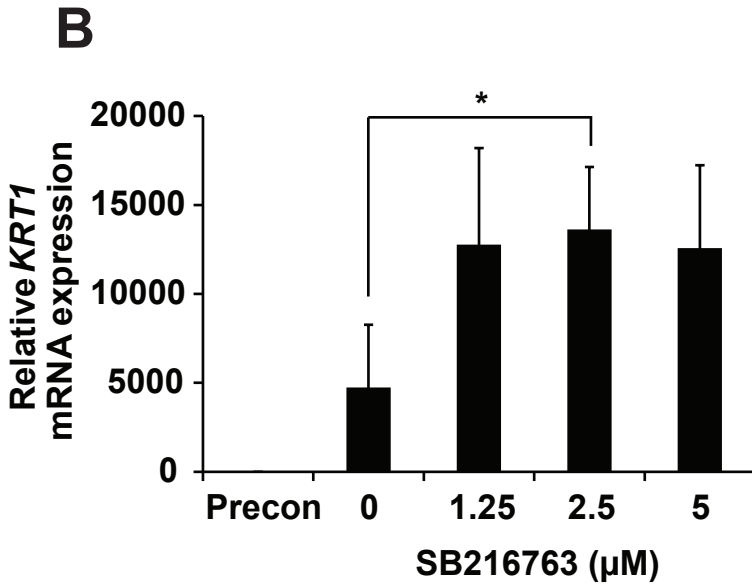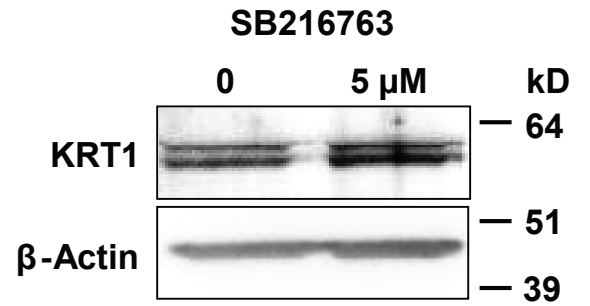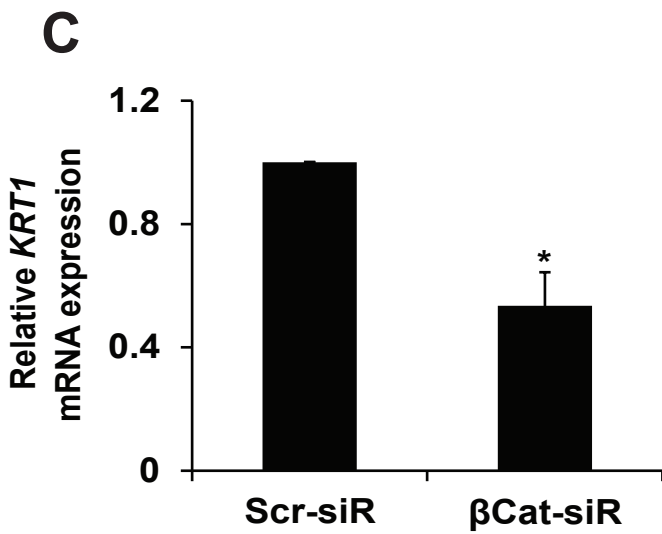

Supplement: mmc2.pdf [file mmc2.pdf]

**A**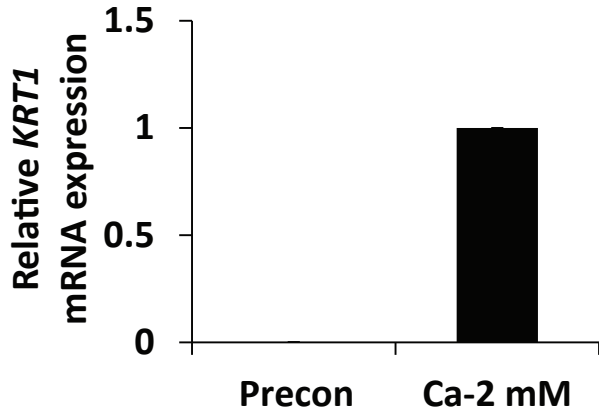**B**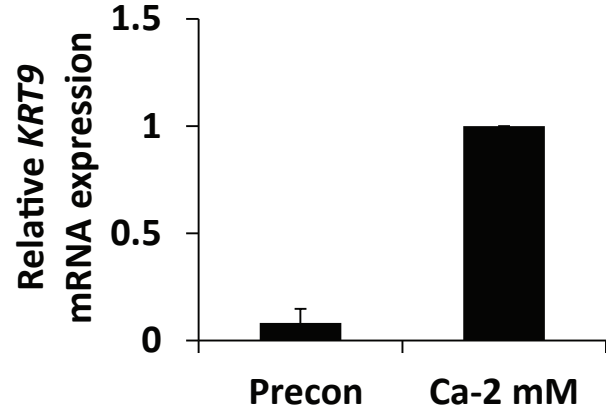**C**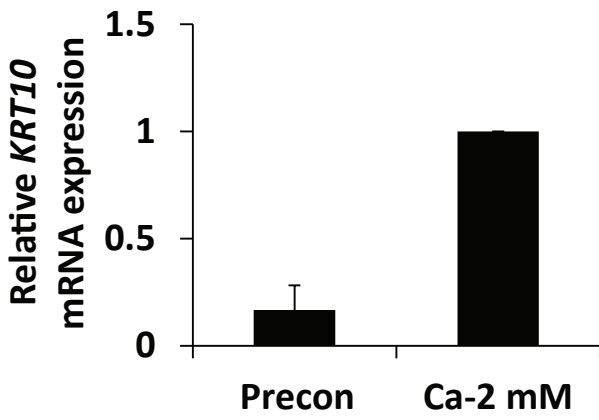

Supplement: mmc3.pdf [file mmc3.pdf]

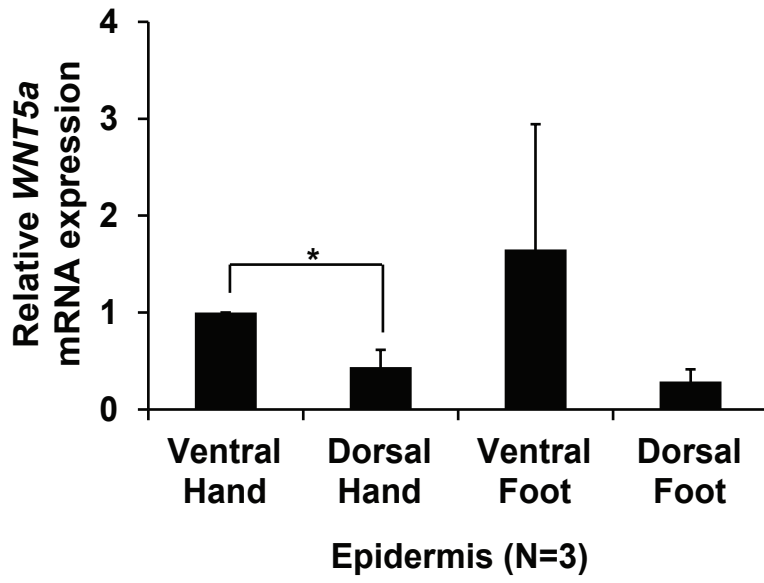

Supplement: mmc4.pdf [file mmc4.pdf]

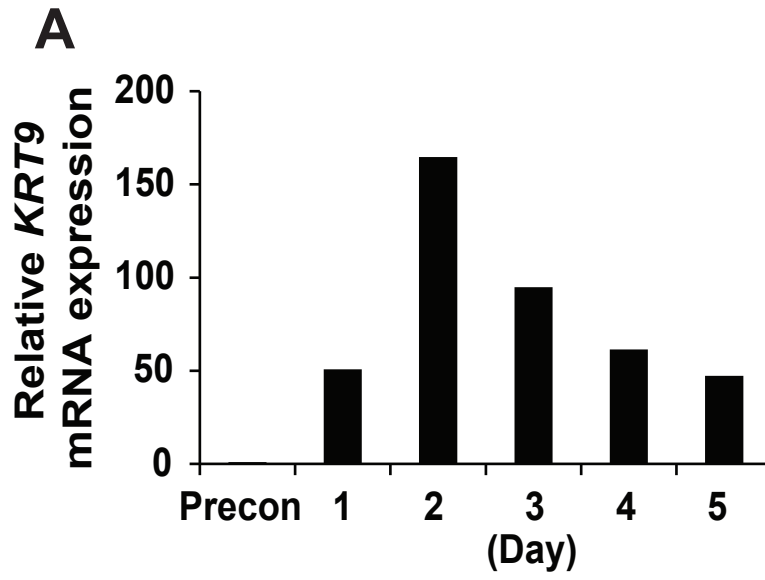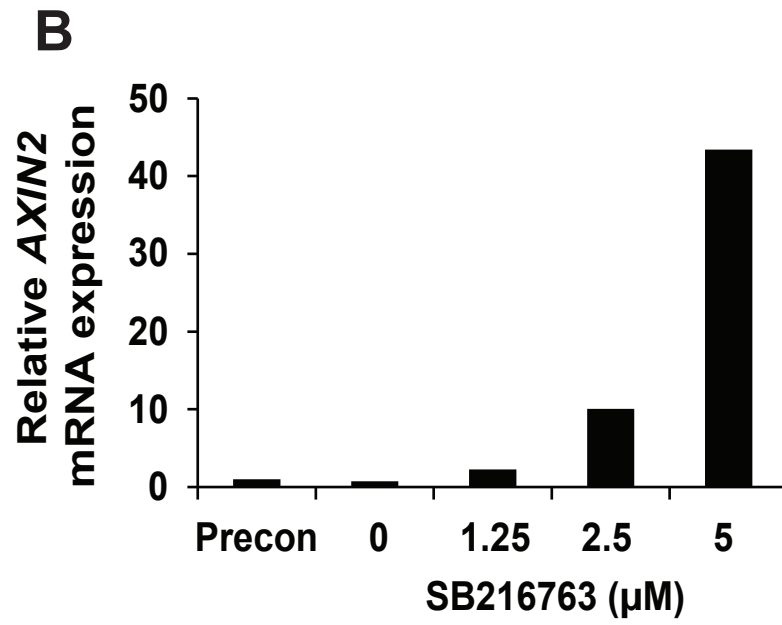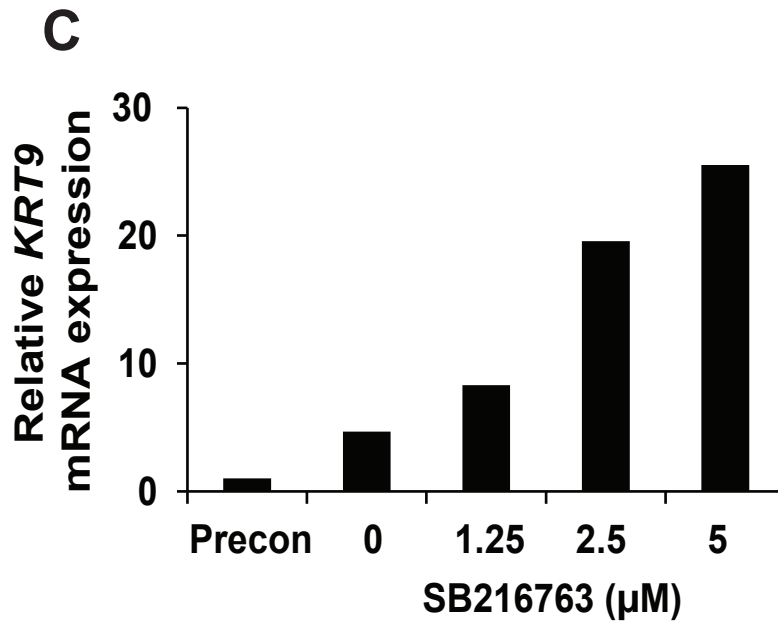

Supplement: mmc5.pdf [file mmc5.pdf]

**A**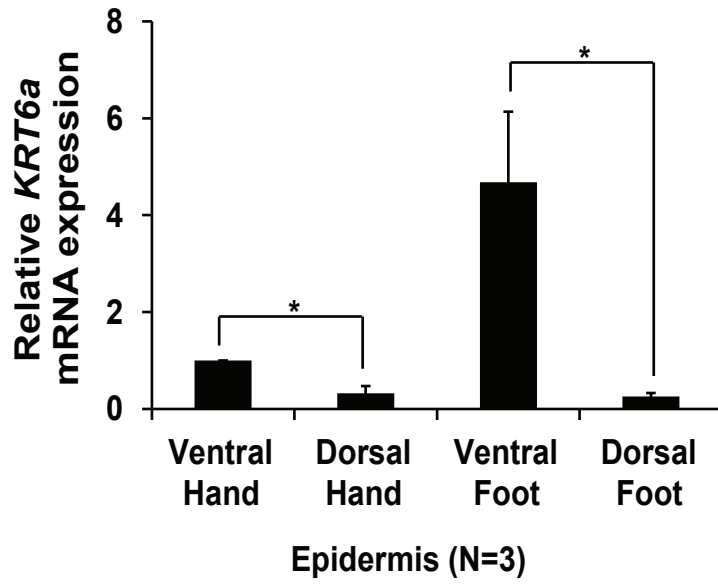**B**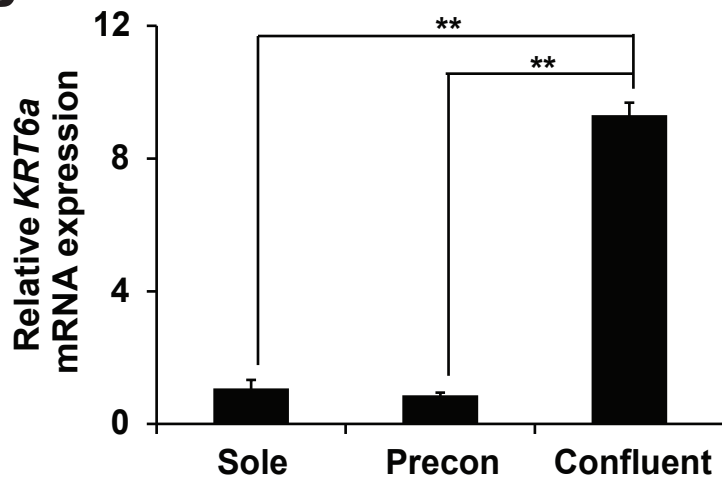

Supplement: mmc6.pdf [file mmc6.pdf]

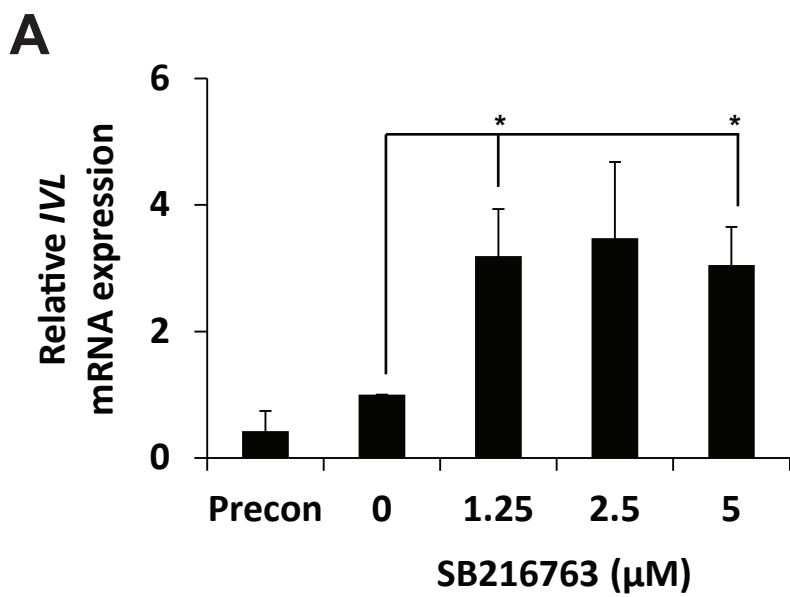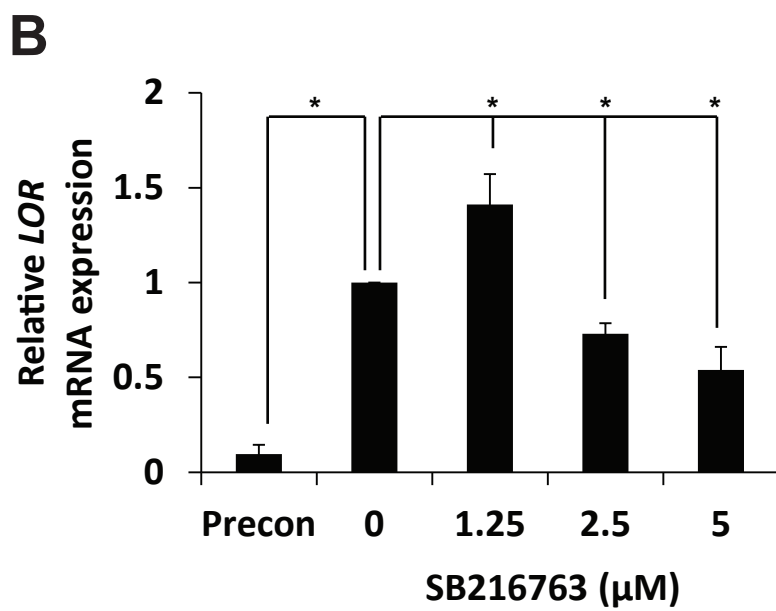

Supplement: mmc7.pdf [file mmc7.pdf]

**A**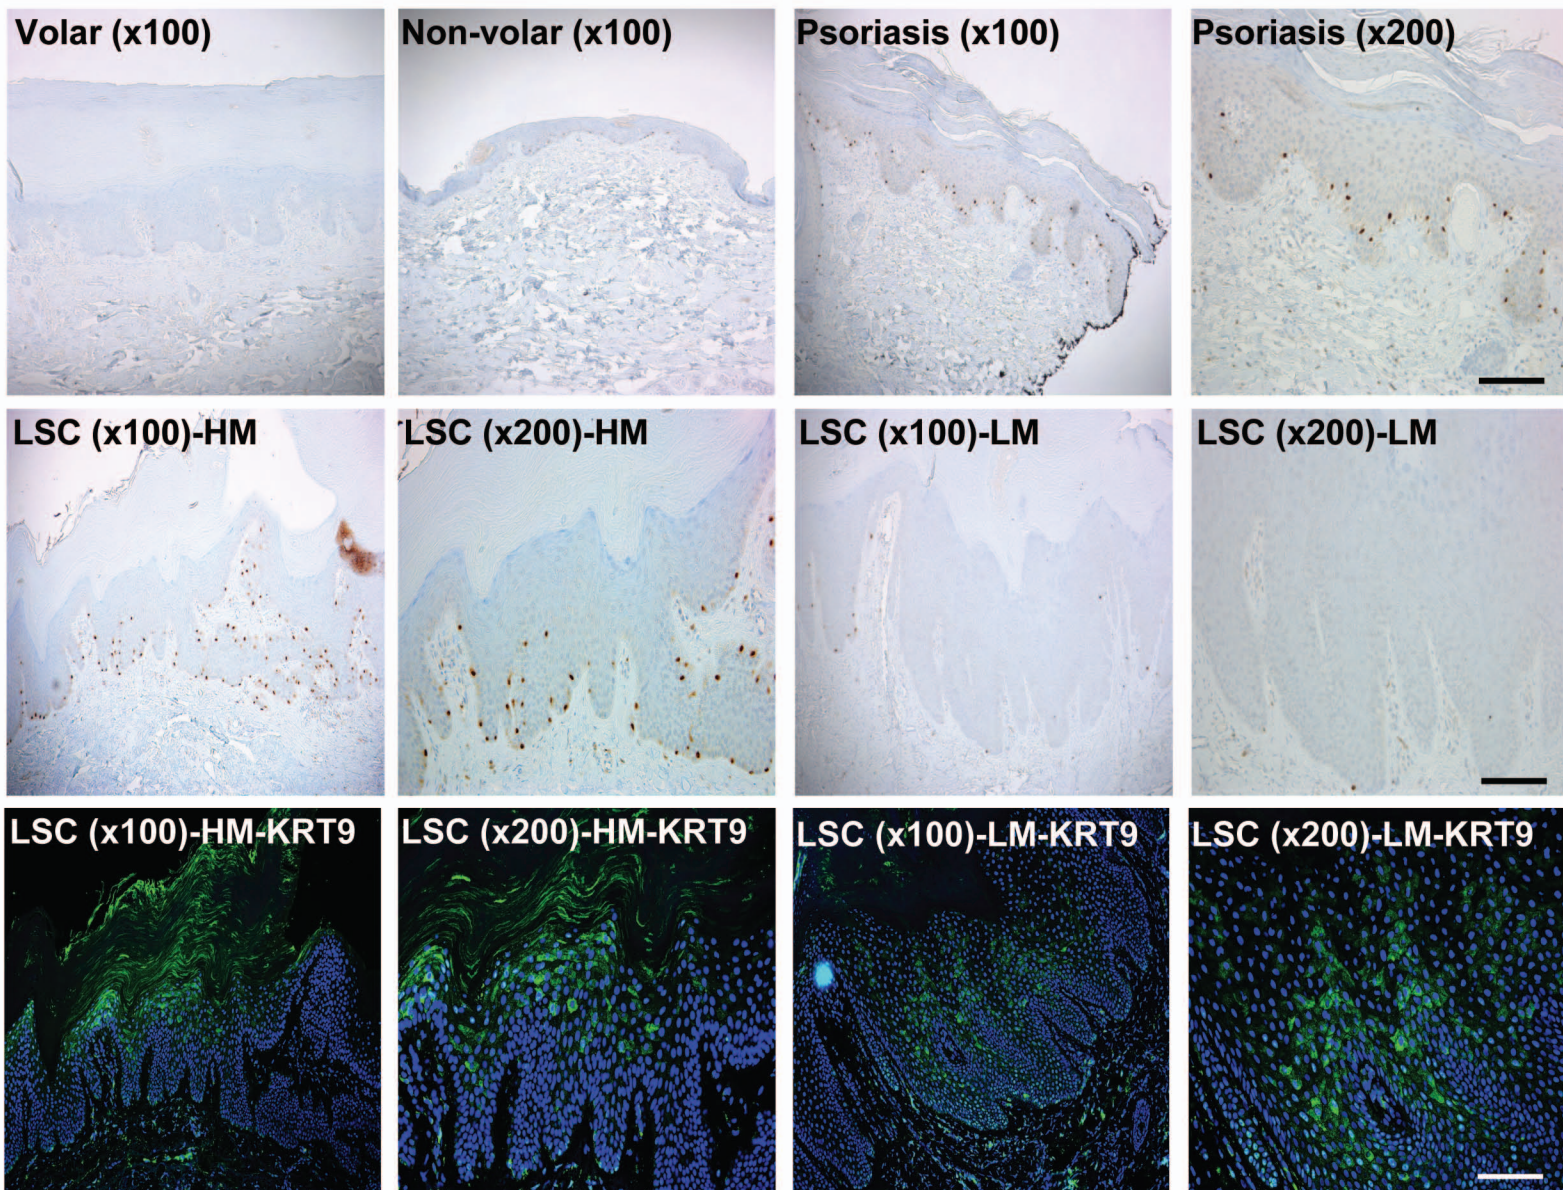**B**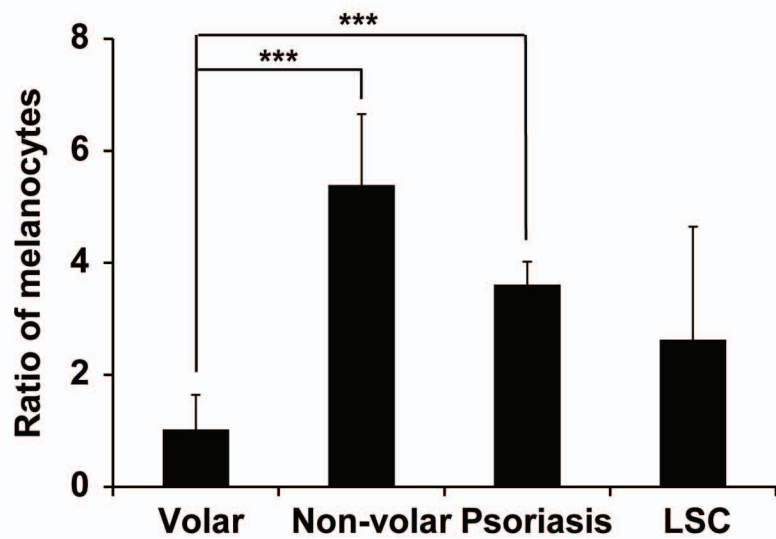**C**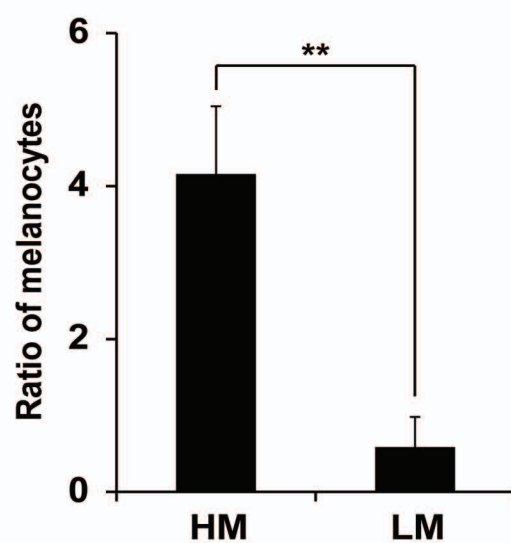

Supplement: mmc8.pdf [file mmc8.pdf]

**A**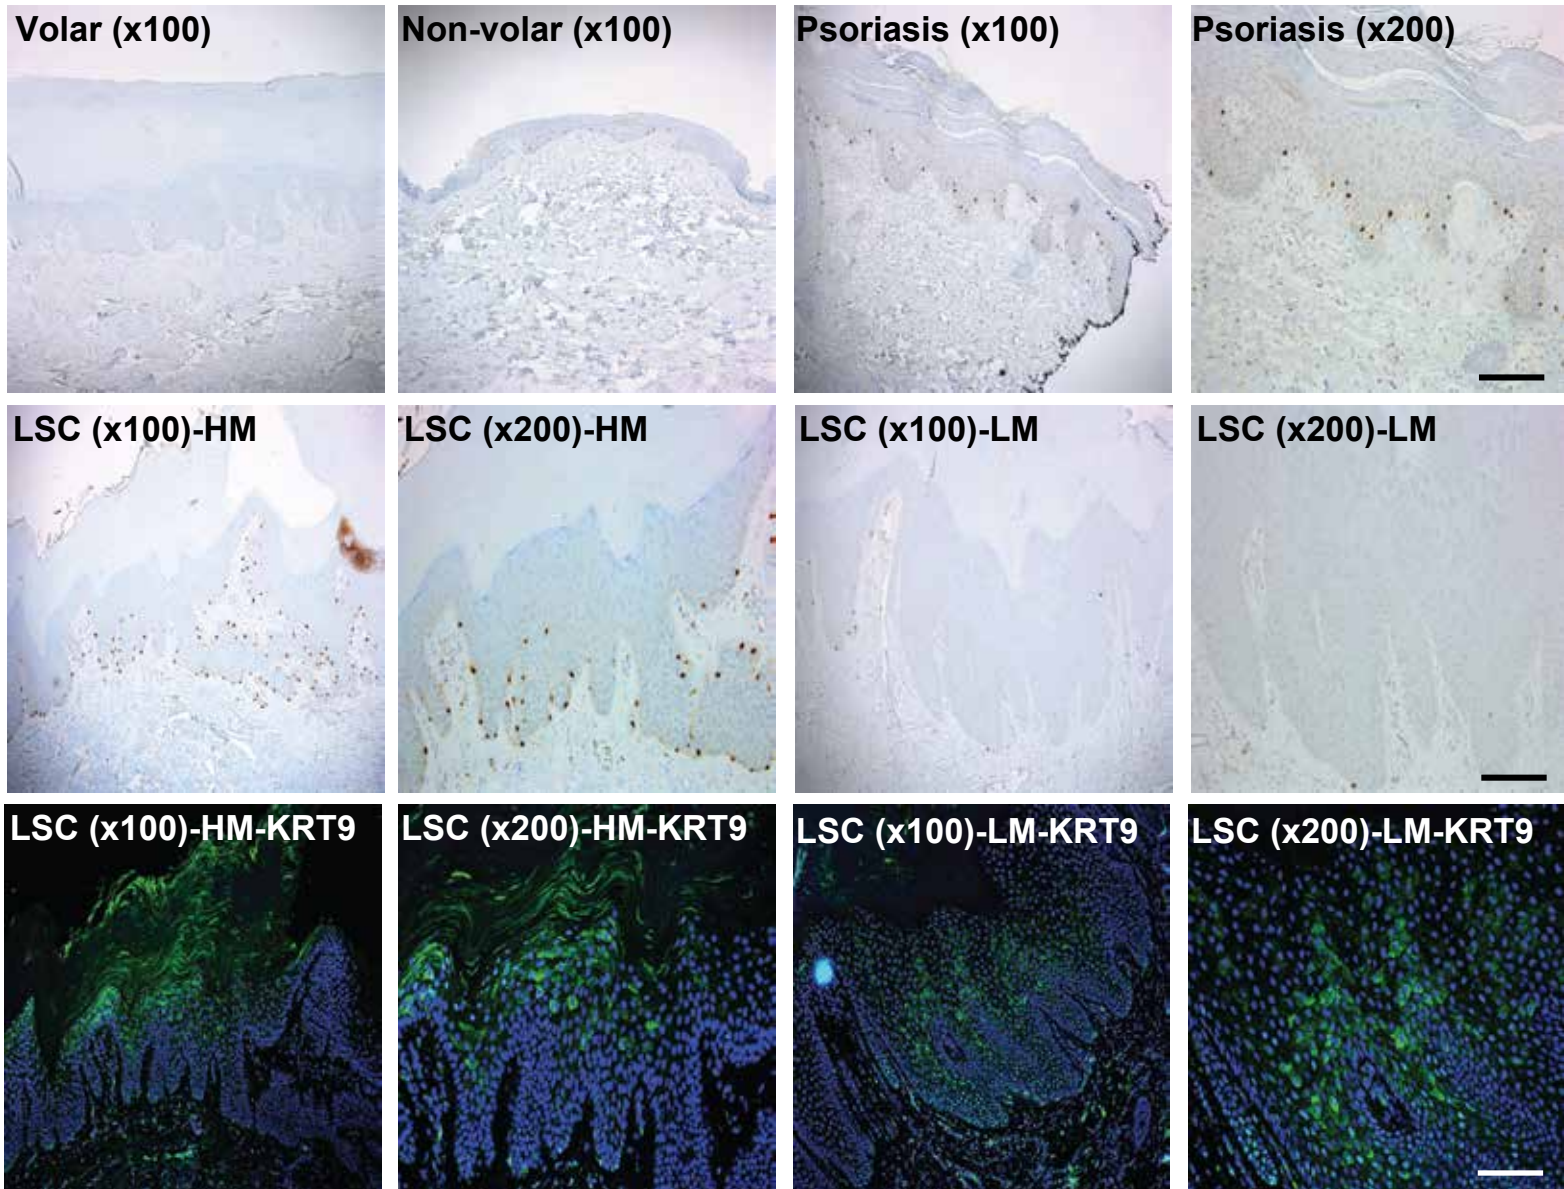**B**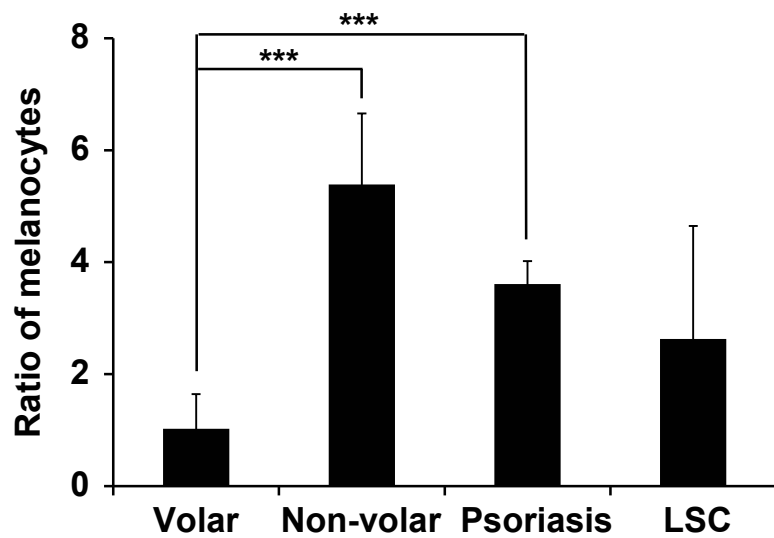**C**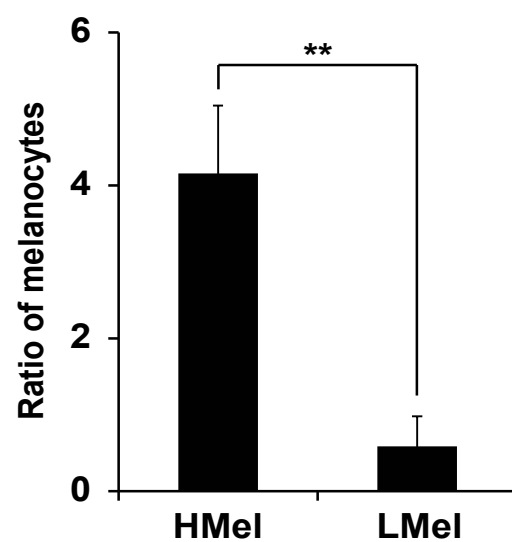

Supplement: mmc9.pdf [file mmc9.pdf]
